# Supplementary material for: Digitally deconstructing leaves in 3D using X‐ray microcomputed tomography and machine learning
Source: PubMed Central journal article supplement (PMC7394714; doi:10.1002/aps3.11380), 2020-07-31

**APPENDIX S2.** Standard deviation of thickness estimates presented in Fig. 2.

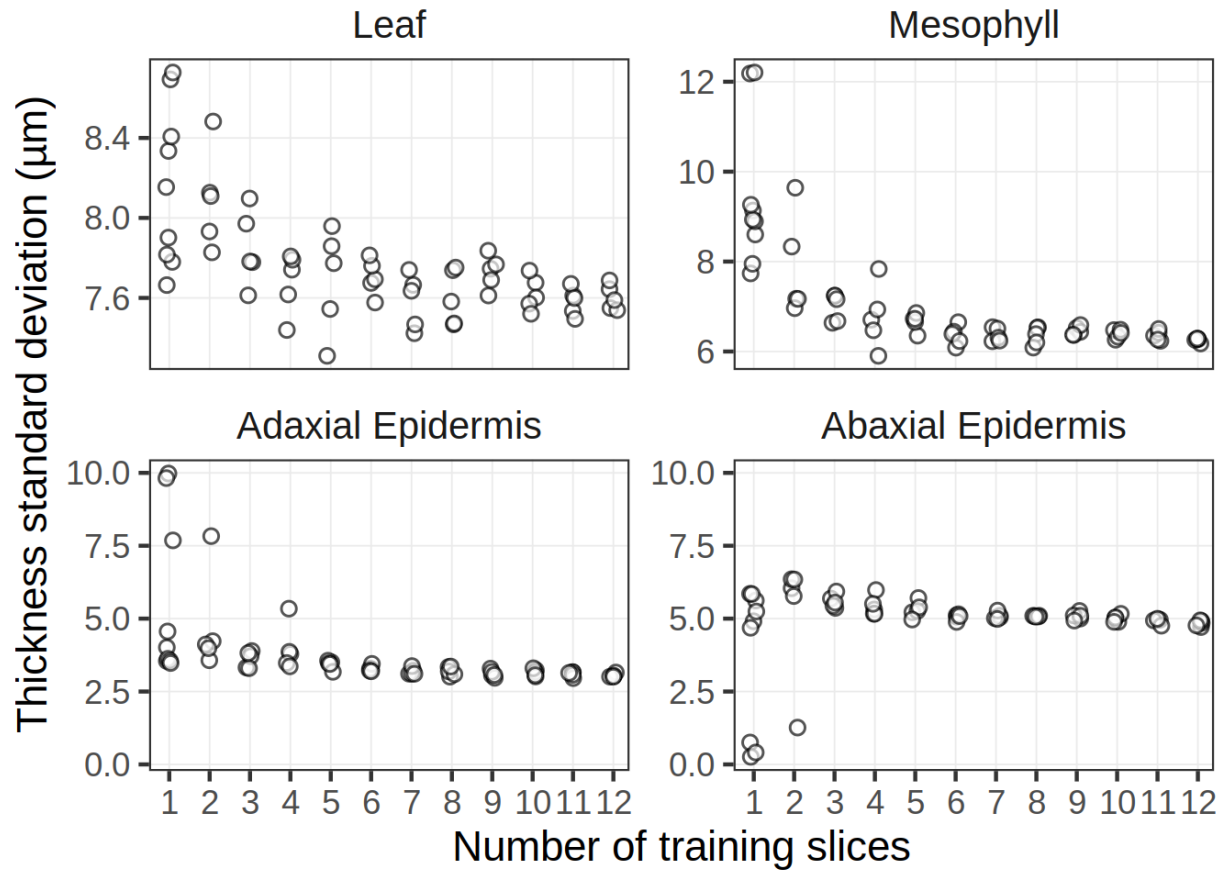

Supplement: APS3-8-e11380-s002.pdf [file APS3-8-e11380-s002.pdf]
